# Supplementary material for: Allocation of Carbon from an Arbuscular Mycorrhizal Fungus, Gigaspora margarita, to Its Gram-Negative and Positive Endobacteria Revealed by High-Resolution Secondary Ion Mass Spectrometry
Source: MDPI journal article supplement (doi:10.3390/microorganisms9122597), 2021-12-16
Supplement: s1 [file s1]

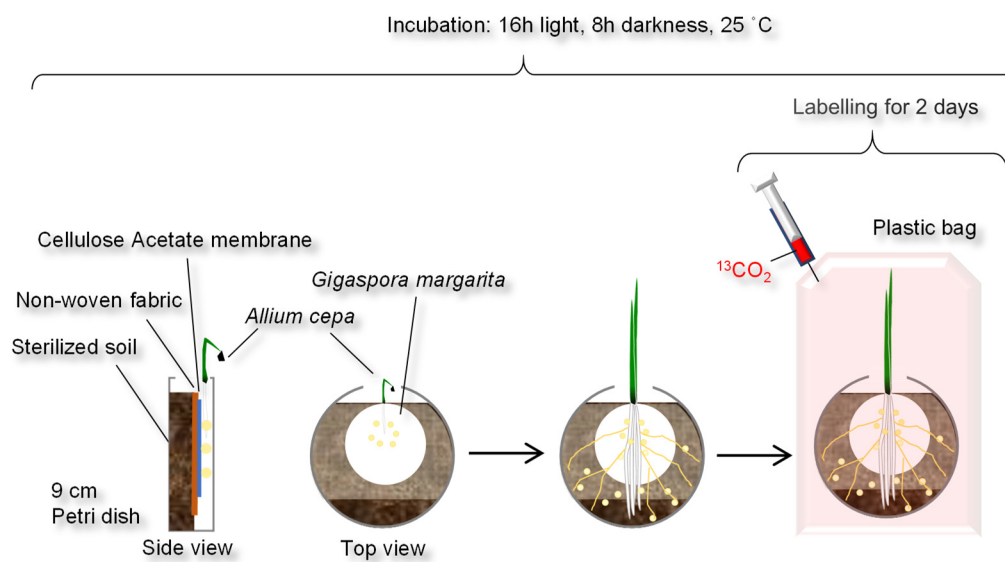

Figure S1 Root box culture and labelling.

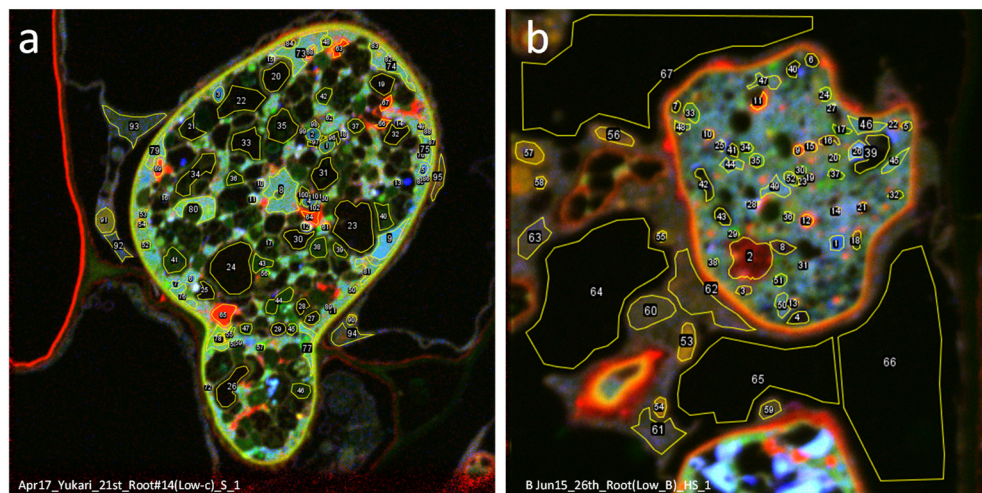

Figure S2. Examples of ROIs of Figure 2.

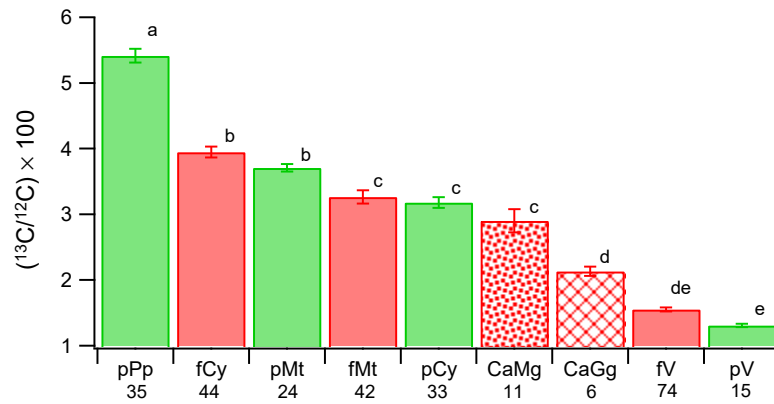

**Figure S3.** Multiple comparisons of r13C of all structures (all ROIs of gram-negative and positive bacteria, and fungal and plant organelles).

CaGg, *Candidatus Glomeribacter gigasporarum*; CaMg, *Candidatus Moenioplasma glomeromycetorum*; fCy, fungal cytoplasm; fMt, fungal mitochondrion; fV, fungal vacuole; pCy, plant cytoplasm; pMt, plant mitochondrion; pPp, plant plastid; pV, plant vacuole. Different letters show statistically significant differences among structures based on the Tukey–Kramer method at  $p < 0.05$ . Bar, standard error of the mean. (N = number of ROI, shown under each structure).

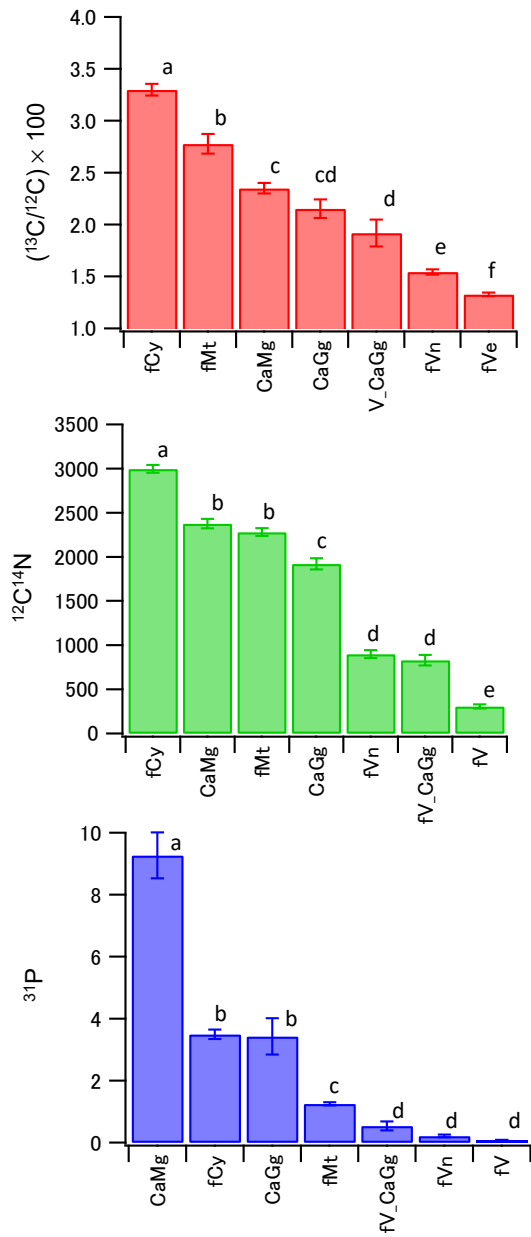

**Figure S4.** ROI analysis of fungal structures of image #4 (Figure S2. a).  $r^{13}\text{C}$  (red),  $^{12}\text{C}^{14}\text{N}$  (green),  $^{31}\text{P}$  (blue). CaGg, *Candidatus Glomeribacter gigasporarum*; CaMg, *Candidatus Moenioplasma glomeromycetorum*; fCy, fungal cytoplasm; fMt, fungal mitochondrion; fV, fungal vacuole; fVn, N-rich fungal vacuole; V\_CaGg, CaGg residing fungal vacuole. Tukey-Kramer method. Different letters show statistically significant differences among structures based on the Tukey-Kramer method at  $p < 0.05$ . Bar, standard error of the mean. (N = number of ROI, shown under each structure).

Table S1. Averages of r13C, <sup>31</sup>P, and <sup>12</sup>C<sup>14</sup>N of ROIs of seven images analyzed.

| Image                 |                                 | CaMg/CaGg | ROI: Structures |         |         |         |         |         |         |         |        |
|-----------------------|---------------------------------|-----------|-----------------|---------|---------|---------|---------|---------|---------|---------|--------|
|                       |                                 |           | CaGg            | CaMg    | fMt     | fCy     | fV      | pPp     | pMt     | pCy     | pV     |
| #2                    | ROI#                            |           | n.d.            | 2       | 7       | 7       | 10      | 7       | 5       | 5       | 4      |
|                       | r13C                            |           | n.d.            | 3.22    | 3.34    | 4.71    | 1.82    | 5.43    | 3.97    | 2.97    | 1.38   |
|                       | <sup>31</sup> p                 |           | n.d.            | 20.95   | 4.38    | 11.86   | 1.61    | 1.84    | 4.38    | 4.36    | 0.26   |
|                       | <sup>12</sup> C <sup>14</sup> N |           | n.d.            | 4420.31 | 4211.25 | 6277.85 | 1192.96 | 3905.06 | 3038.78 | 2447.66 | 585.60 |
| #3                    | ROI#                            |           | 1               | 2       | 9       | 8       | 10      | n.d.    | n.d.    | 3       | n.d.   |
|                       | r13C                            | Δ1.96     | 1.99            | 2.94    | 3.66    | 4.29    | 1.55    | n.d.    | n.d.    | 3.35    | n.d.   |
|                       | <sup>31</sup> p                 | 2.64      | 11.96           | 31.56   | 7.36    | 19.72   | 4.26    | n.d.    | n.d.    | 7.96    | n.d.   |
|                       | <sup>12</sup> C <sup>14</sup> N | 1.23      | 4119.15         | 5077.14 | 4549.00 | 6518.98 | 989.10  | n.d.    | n.d.    | 2024.18 | n.d.   |
| #4<br>(Figure S2. a)  | ROI#                            |           | 4               | 3       | 8       | 10      | 17      | 2       | n.d.    | 4       | n.d.   |
|                       | r13C                            | Δ1.17     | 2.15            | 2.35    | 2.78    | 3.30    | 1.33    | 3.44    | n.d.    | 2.31    | n.d.   |
|                       | <sup>31</sup> p                 | 2.70      | 3.43            | 9.27    | 1.25    | 3.50    | 0.08    | 0.70    | n.d.    | 1.33    | n.d.   |
|                       | <sup>12</sup> C <sup>14</sup> N | 1.24      | 1922.09         | 2375.88 | 2280.57 | 2996.86 | 305.30  | 1974.16 | n.d.    | 1139.51 | n.d.   |
| #13<br>(Figure S2. b) | ROI#                            |           | n.d.            | 1       | 12      | 7       | 5       | 6       | 2       | 3       | 4      |
|                       | r13C                            |           | n.d.            | 2.65    | 3.34    | 3.85    | 1.86    | 5.26    | 3.44    | 3.22    | 1.19   |
|                       | <sup>31</sup> p                 |           | n.d.            | 30.13   | 8.50    | 16.54   | 3.49    | 3.83    | 6.79    | 7.34    | 0.12   |
|                       | <sup>12</sup> C <sup>14</sup> N |           | n.d.            | 3817.71 | 4492.25 | 4823.74 | 1203.48 | 3684.64 | 2524.94 | 2278.70 | 402.99 |
| #14                   | ROI#                            |           | n.d.            | 1       | n.d.    | 1       | 13      | 10      | 9       | 8       | n.d.   |
|                       | r13C                            |           | n.d.            | 3.10    | n.d.    | 3.83    | 1.38    | 5.50    | 3.61    | 3.45    | n.d.   |
|                       | <sup>31</sup> p                 |           | n.d.            | 34.26   | n.d.    | 6.81    | 0.71    | 2.23    | 5.37    | 7.72    | n.d.   |
|                       | <sup>12</sup> C <sup>14</sup> N |           | n.d.            | 5054.76 | n.d.    | 6572.26 | 1051.36 | 4147.33 | 2900.28 | 2769.79 | n.d.   |
| #15                   | ROI#                            |           | 1               | 1       | 3       | 6       | 9       | n.d.    | n.d.    | n.d.    | n.d.   |
|                       | r13C                            | Δ1.55     | 2.10            | 2.70    | 2.70    | 3.67    | 1.74    | n.d.    | n.d.    | n.d.    | n.d.   |
|                       | <sup>31</sup> p                 | 2.40      | 13.19           | 31.60   | 7.39    | 16.50   | 1.33    | n.d.    | n.d.    | n.d.    | n.d.   |
|                       | <sup>12</sup> C <sup>14</sup> N | 1.02      | 4280.44         | 4365.54 | 4230.73 | 5993.89 | 1073.89 | n.d.    | n.d.    | n.d.    | n.d.   |
| #21                   | ROI#                            |           | n.d.            | 1       | 3       | 5       | 10      | 10      | 8       | 10      | 7      |
|                       | r13C                            |           | n.d.            | 4.15    | 3.39    | 4.10    | 1.53    | 5.79    | 3.73    | 3.34    | 1.33   |
|                       | <sup>31</sup> p                 |           | n.d.            | 15.56   | 4.38    | 8.22    | 1.09    | 2.40    | 4.43    | 5.38    | 0.17   |
|                       | <sup>12</sup> C <sup>14</sup> N |           | n.d.            | 3781.67 | 3322.95 | 3753.37 | 853.69  | 2993.93 | 2210.50 | 2007.32 | 492.97 |

- r13C: (<sup>13</sup>C/<sup>12</sup>C)\*100
- ΔCaMg/CaGg = (CaMg-1)/(CaGg-1)
- CaGg, *Candidatus* Glomeribacter gigasporarum; CaMg, *Candidatus* Moenioplasma glomeromycetorum; fMt, fungal mitochondrion; fCy, fungal cytoplasm; fV, fungal vacuole; pPp, plant pastid; pMt, plant mitochondrion; pCy, plant cytoplasm; pV, plant vacuole.
- n.d.: the organelles or cells are not exist or analyzed.
- Values of <sup>12</sup>C<sup>14</sup>N and <sup>31</sup>P were normalized by a counting time.

Table S2. r13C of structures and the multiple comparison within plant and fungus (Tukey–Kramer method)

|        |      | # of Sample | r13C Mean         | Unbiased variance | Standard deviation | Standard error of the mean |
|--------|------|-------------|-------------------|-------------------|--------------------|----------------------------|
| Plant  | pPp  | 5           | 5.09 <sup>a</sup> | 0.89              | 0.94               | 0.42                       |
|        | pMt  | 4           | 3.69 <sup>b</sup> | 0.05              | 0.22               | 0.11                       |
|        | pCy  | 6           | 3.11 <sup>b</sup> | 0.18              | 0.42               | 0.17                       |
|        | pV   | 3           | 1.30 <sup>c</sup> | 0.01              | 0.10               | 0.06                       |
| Fungus | fCy  | 7           | 3.96 <sup>a</sup> | 0.21              | 0.45               | 0.17                       |
|        | fMt  | 6           | 3.20 <sup>b</sup> | 0.14              | 0.38               | 0.15                       |
|        | CaMg | 7           | 3.02 <sup>b</sup> | 0.34              | 0.58               | 0.22                       |
|        | CaGg | 3           | 2.08 <sup>c</sup> | 0.01              | 0.08               | 0.05                       |
|        | fV   | 7           | 1.60 <sup>c</sup> | 0.05              | 0.21               | 0.08                       |

• r13C: (<sup>13</sup>C/<sup>12</sup>C)\*100

• CaGg, *Candidatus* Glomeribacter gigasporarum; CaMg, *Candidatus* Moenioplasma glomeromycetorum; fMt, fungal mitochondrion; fCy, fungal cytoplasm; fV, fungal vacuole; pPp, plant pastid; pMt, plant mitochondrion; pCy, plant cytoplasm; pV, plant vacuole.
